# Supplementary material for: Effects of oral calcium on reproduction and postpartum health in cattle: a meta-analysis and quality assessment
Source: Front Vet Sci. 2024 Apr 10;11:1357640. doi: 10.3389/fvets.2024.1357640 (PMC11041631; doi:10.3389/fvets.2024.1357640)
Supplement: Supplementary file 2 [file Table_1.XLSX]

## Sheet: Sheet2
study	n1	event1	n2	event2
Melendez et al.,2003	158	0	160	2
Hajikolaei et al.,2021	79	0	80	2
Jahani-Moghadam et al.,2018	33	2	33	12
Domino et al.,2017	475	3	523	1
Pinedo et al.,2021	45	32	43	37
study	n1	event1	n2	event2
Goff et al.,1996①	25	4	21	6
Goff et al.,1996②	29	5	28	3
Leno et al.,2018①	298	5	297	10
Leno et al.,2018②	238	2	240	4
Leno et al.,2018③	448	10	449	14
Leno et al.,2018④	264	2	249	5
Leno et al.,2018⑤	267	25	276	20
Leno et al.,2018⑥	461	14	462	22
Jahani-Moghadam et al.,2018	33	16	33	14
Ramella et al.,2020	60	36	60	35
Valldecabres et al.,2018	34	24	39	10
Martinez et al.,2016B①	56	33	56	37
Martinez et al.,2016B②	56	16	56	37
Martinez et al.,2016B③	92	52	92	67
Martinez et al.,2016B④	92	39	92	67
study	n1	mean1	sd1	n2	mean2	sd2
Goff et al.,1996①	25	1.8	0.3	21	1.71	0.24
Goff et al.,1996②	21	1.8	0.42	24	1.5	0.33
Goff et al.,1996③	29	1.99	0.3	28	1.83	0.24
Leno et al.,2018	25	1.93	0.2	25	1.97	0.2
Melendez et al.,2021①	10	2.29	0.16	10	2.25	0.22
Melendez et al.,2021②	10	2.21	0.06	10	2.04	0.09
Melendez et al.,2021③	10	1.98	0.25	10	1.89	0.25
Kurek et al.,2016①	20	2.07	0.14	20	1.83	0.19
Kurek et al.,2016②	20	2.05	0.12	20	1.83	0.19
Jahani-Moghadam et al.,2018	33	1.77	0.4	33	1.54	0.5
Ramella et al.,2020	60	2.11	0.19	60	2.13	0.22
Stevenson et al.,1999	176	2.13	0.28	174	2.14	0.27
Braun et al.,2012	5	1.55	0.48	5	1.64	0.22
Farnia et al.,2018	14	2.13	0.11	14	2.04	0.08
Valldecabres et al.,2018	34	2.13	0.41	39	2.27	0.37
Reitsma et al.,2020①	21	2.11	0.08	22	2.1	0.08
Reitsma et al.,2020②	21	2.1	0.08	22	2.1	0.08
Martinez et al.,2016B①	6	2.13	0.05	6	2.09	0.05
Martinez et al.,2016B②	6	2.2	0.05	6	2.09	0.05
Martinez et al.,2016B③	148	2.26	0.12	148	2.21	0.12
Martinez et al.,2016B④	148	2.31	0.12	148	2.21	0.12
Blanc et al.,2014	11	2	0.33	11	1.85	0.33
Pinedo et al.,2021	45	2.14	0.07	43	2.08	0.07
study	n1	mean1	sd1	n2	mean2	sd2
Kurek et al.,2016①	20	0.89	0.08	20	1.27	0.22
Kurek et al.,2016②	20	1.07	0.13	20	1.27	0.22
Jahani-Moghadam et al.,2018	33	1.02	0.17	33	1.03	0.17
Stevenson et al.,1999	176	0.75	0.28	174	0.72	0.13
Braun et al.,2012	5	1.13	0.33	5	1.17	0.07
Farnia et al.,2018	14	0.8	0.01	14	0.84	0.02
Ramella et al.,2020	60	1.02	0.19	60	1.05	0.24
Valldecabres et al.,2018	34	1	0.23	39	0.93	0.19
Melendez et al.,2021	30	1.03	0.05	30	1.01	0.05
Martinez et al.,2016B①	6	0.94	0.05	6	0.94	0.05
Martinez et al.,2016B②	6	0.95	0.05	6	0.94	0.05
Martinez et al.,2016B③	148	0.91	0.12	148	0.93	0.12
Martinez et al.,2016B④	148	0.94	0.12	148	0.93	0.12
study	n1	mean1	sd1	n2	mean2	sd2
Kurek et al.,2016①	20	1.84	0.46	20	1.54	0.39
Kurek et al.,2016②	20	1.97	0.28	20	1.54	0.39
Jahani-Moghadam et al.,2018	33	1.69	0.34	33	1.61	0.29
Stevenson et al.,1999	176	1.56	0.53	174	1.61	0.53
Farnia et al.,2018	14	1.76	0.31	14	1.6	0.25
Ramella et al.,2020	60	1.91	0.44	60	2.1	0.46
Valldecabres et al.,2018	34	1.89	0.82	39	2.14	0.34
Melendez et al.,2021	30	1.95	0.33	30	1.98	0.33
study	n1	event1	n2	event2
Goff et al.,1996	21	2	24	4
Hajikolaei et al.,2021	79	1	80	12
Leno et al.,2018①	374	18	364	19
Leno et al.,2018②	119	3	126	7
Leno et al.,2018③	431	29	423	21
Leno et al.,2018④	651	48	647	64
Jahani-Moghadam et al.,2018	33	1	33	3
Ramella et al.,2020	60	17	60	24
Domino et al.,2017	475	19	523	27
study	n1	event1	n2	event2
Melendez et al.,2003	158	78	160	83
Leno et al.,2018①	383	42	373	41
Leno et al.,2018②	679	57	673	43
Leno et al.,2018③	381	28	380	42
Ramella et al.,2020	60	2	60	2
Oetzel et al.,2012	431	74	496	75
Reitsma et al.,2020①	21	6	22	5
Reitsma et al.,2020②	20	1	20	2
Valldecabres et al.,2018	100	2	105	2
Martinez et al.,2016B①	56	31	56	19
Martinez et al.,2016B②	56	30	56	19
Martinez et al.,2016B③	92	21	92	14
Martinez et al.,2016B④	92	19	92	14
Domino et al.,2017	475	34	523	55
study	n1	event1	n2	event2
Melendez et al.,,2003	158	12	160	14
Goff et al.,1996	21	0	24	1
Jahani-Moghadam et al.,2018	33	3	33	2
Oetzel et al.,2021	290	175	334	192
study	n1	event1	n2	event2
Leno et al.,2018①	238	11	248	4
Leno et al.,2018②	245	4	238	9
Leno et al.,2018③	1410	72	1422	76
Oetzel et al.,2012	431	56	496	53
Reitsma et al.,2020①	21	1	22	2
Reitsma et al.,2020②	20	8	20	8
Domino et al.,2017	475	68	523	80
Goff et al.,1996	21	3	24	3
study	n1	event1	n2	event2
Melendez et al.,2003	158	4	160	10
Goff et al.,1996	21	2	24	1
Leno et al.,2018①	668	15	665	13
Leno et al.,2018②	368	12	366	23
Oetzel et al.,2012	431	19	496	20
study	n1	event1	n2	event2
Melendez et al.,2003	158	44	160	52
Stevenson et al.,1999	135	80	133	61
Oetzel et al.,2012	343	132	398	167
Leno et al.,2018①	395	176	391	171
Leno et al.,2018②	1166	431	1151	432
Valldecabres et al.,2021	594	182	581	185
Martinez et al.,2016A①	56	19	56	27
Martinez et al.,2016A②	56	22	56	27
Martinez et al.,2016A③	92	32	91	26
Martinez et al.,2016A④	91	37	91	26
Domino et al.,2017	423	136	471	138
Mahjoubi et al.,2023①	90	42	82	46
Mahjoubi et al.,2023②	81	34	82	46
Jahani-Moghadam et al.,2018	29	19	29	12
study	n1	event1	n2	event2
Melendez et al.,2003	158	101	160	104
Hajikolaei et al.,2021	78	63	80	59
Jahani-Moghadam et al.,2018	32	28	33	30
Stevenson et al.,1999	135	134	133	133
Oetzel et al.,2012	337	238	390	264
Reitsma et al.,2020①	21	20	22	17
Reitsma et al.,2020②	20	16	20	12
Farnia et al.,2018	14	10	14	9
Valldecabres et al.,2021	594	400	581	387
Martinez et al.,2016A①	56	19	56	25
Martinez et al.,2016A②	56	22	56	25
Martinez et al.,2016A③	92	32	91	26
Martinez et al.,2016A④	91	37	91	26
study	n1	mean1	sd1	n2	mean2	sd2
Valldecabres et al.,2021	520	31.61	7.53	513	31.46	7.7
Leno et al.,2018①	272	33.7	0.9	267	32.7	0.9
Leno et al.,2018②	114	34.7	1	110	31.9	1
Leno et al.,2018③	454	46.8	1.2	444	47	1.2
Leno et al.,2018④	635	47.7	1.2	629	46.8	1.2
Jahani-Moghadam et al.,2018	33	46.68	2.06	33	43	1.79
Melendez et al.,2021	30	29.9	0.55	30	30.5	0.55
Ramella et al.,2020	60	28.86	8.33	60	30.99	7.33
Oetzel et al.,2012	412	41.1	10.15	497	40.5	11.15
Melendez et al.,2003	158	40.2	4.4	160	40.1	4.43
Stevenson et al.,1999	120	19.45	3.29	124	19.57	3.3
Reitsma et al.,2020①	21	23.5	5.64	22	23.5	5.77
Reitsma et al.,2020②	21	23.6	5.64	22	23.5	5.77
Martinez et al.,2016A①	148	31.7	6.1	148	32.3	6.1
Martinez et al.,2016A②	148	31.9	6.1	148	32.3	6.1
Domino et al.,2017	475	46.7	0.4	523	47	0.4
